# Supplementary material for: The persistence of primary school students’ initial ideas about acids and bases in the mental models of adults
Source: Royal Society of Chemistry journal article supplement (doi:10.1039/d0rp00156b), 2020-10-14
Supplement: d0rp00156b1.pdf [file d0rp00156b1.pdf]

## Appendices

### Appendix 1

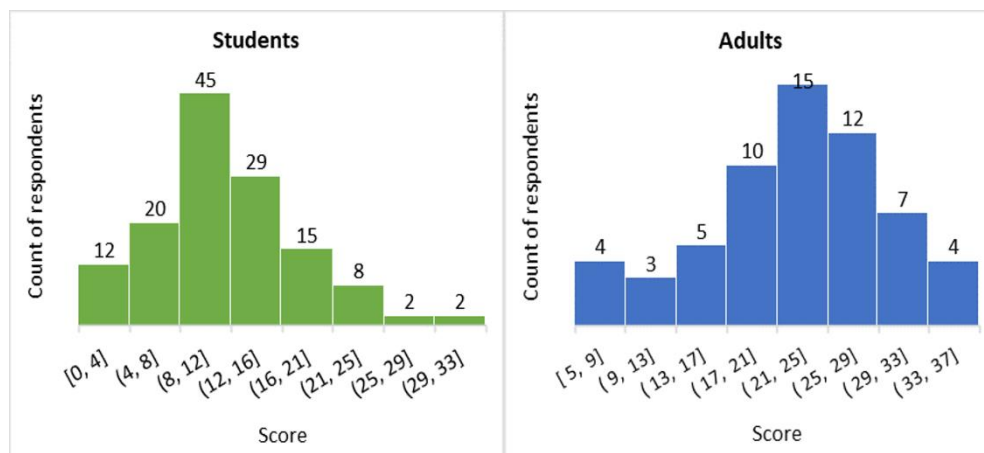

**Figure 1** Frequency distribution of scores achieved by respondents

### Appendix 2

**Table 6** Statistical analysis of answers provided by student respondents based on types (questions No. 1, 6, 17 cannot be categorised)

| No. of Question | Total No. of Answers | Acceptable |      | Naive |      | Unacceptable/Blank |      |
|-----------------|----------------------|------------|------|-------|------|--------------------|------|
|                 |                      | Qty        | %    | Qty   | %    | Qty                | %    |
| 2               | 191                  | 100        | 52,4 | 39    | 20,4 | 52                 | 27,2 |
| 3               | 173                  | 90         | 52,0 | 42    | 24,3 | 41                 | 23,7 |
| 4a              | 138                  | 75         | 43,4 | 9     | 5,2  | 54                 | 31,2 |
| 4b              | 141                  | 72         | 41,6 | 10    | 5,8  | 59                 | 34,1 |
| 5               | 186                  | 71         | 41,0 | 83    | 48,0 | 32                 | 18,5 |
| 7               | 143                  | 64         | 37,0 | 23    | 13,3 | 56                 | 32,4 |
| 8               | 136                  | 9          | 5,2  | 26    | 15,0 | 101                | 58,4 |
| 9               | 135                  | 22         | 12,7 | 9     | 5,2  | 104                | 60,1 |
| 10              | 134                  | 15         | 8,7  | 5     | 2,9  | 114                | 65,9 |
| 11              | 137                  | 14         | 8,1  | 10    | 5,8  | 113                | 65,3 |
| 12              | 138                  | 18         | 10,4 | 34    | 19,7 | 86                 | 49,7 |
| 13              | 134                  | 10         | 5,8  | 18    | 10,4 | 106                | 61,3 |
| 14              | 135                  | 15         | 8,7  | 13    | 7,5  | 107                | 61,8 |
| 15              | 136                  | 27         | 15,6 | 11    | 6,4  | 98                 | 56,6 |
| 16a             | 135                  | 15         | 8,7  | 4     | 2,3  | 116                | 67,1 |
| 16b             | 133                  | 0          | 0,0  | 4     | 2,3  | 129                | 74,6 |
| 18              | 133                  | 28         | 16,2 | 6     | 3,5  | 99                 | 57,2 |
| 19              | 137                  | 1          | 0,6  | 60    | 34,7 | 76                 | 43,9 |
| 20              | 151                  | 90         | 52,0 | 43    | 24,9 | 18                 | 10,4 |

### Appendix 3

**Table 7** Statistical analysis of answers provided by adult respondents based on types (questions No. 1, 6, 17 cannot be categorised)

| No. of Question | Total No. of Answers | Acceptable |      | Naïve |      | Unacceptable/Blank |      |
|-----------------|----------------------|------------|------|-------|------|--------------------|------|
|                 |                      | Qty        | %    | Qty   | %    | Qty                | %    |
| 2               | 82                   | 45         | 54,9 | 20    | 24,4 | 17                 | 20,7 |
| 3               | 79                   | 33         | 41,8 | 20    | 25,3 | 26                 | 32,9 |
| 4a              | 66                   | 42         | 63,6 | 12    | 18,2 | 12                 | 18,2 |
| 4b              | 72                   | 54         | 75,0 | 7     | 9,7  | 11                 | 15,3 |
| 5               | 104                  | 57         | 54,8 | 44    | 42,3 | 3                  | 2,9  |
| 7               | 75                   | 62         | 82,7 | 6     | 8,0  | 7                  | 9,3  |
| 8               | 68                   | 33         | 48,5 | 21    | 30,9 | 14                 | 20,6 |
| 9               | 63                   | 42         | 66,7 | 6     | 9,5  | 15                 | 23,8 |
| 10              | 72                   | 45         | 62,5 | 4     | 5,6  | 23                 | 31,9 |
| 11              | 68                   | 29         | 42,6 | 17    | 25,0 | 22                 | 32,4 |
| 12              | 71                   | 32         | 45,1 | 18    | 25,4 | 21                 | 29,6 |
| 13              | 47                   | 34         | 72,3 | 9     | 19,1 | 4                  | 8,5  |
| 14              | 70                   | 39         | 55,7 | 14    | 20,0 | 17                 | 24,3 |
| 15              | 63                   | 32         | 50,8 | 9     | 14,3 | 22                 | 34,9 |
| 16a             | 65                   | 39         | 60,0 | 4     | 6,2  | 22                 | 33,8 |
| 16b             | 60                   | 1          | 1,7  | 9     | 15,0 | 50                 | 83,3 |
| 18              | 63                   | 42         | 66,7 | 7     | 11,1 | 14                 | 22,2 |
| 19              | 62                   | 9          | 14,5 | 27    | 43,5 | 26                 | 41,9 |
| 20              | 71                   | 30         | 42,3 | 23    | 32,4 | 18                 | 25,4 |
